# Supplementary material for: Bioconjugated lanthanide luminescent helicates as multilabels for lab-on-a-chip detection of cancer biomarkers
Source: Royal Society of Chemistry journal article supplement (doi:10.1039/b922124g), 2009-11-20
Supplement: b922124g.pdf [file b922124g.pdf]

05/11/2009 14:13:34

**Bioconjugated Lanthanide Luminescent Helicates as Multilabels for Lab-on-a-Chip Detection of Cancer Biomarkers**

**Vanesa Fernandez Moreira, Bo Song, Venkataragavalu Sivagnanam, Anne-Sophie Chauvin, Caroline D. B. Vandevyver, Martin Gijs, Ilkka Hemmilä, Hans-Anton Fehr, and Jean-Claude G. Bünzli**

**Electronic Supporting Information**

6 pages

## 1. Methods and reagents

The Eu-W8044 luminescent complex (see Figure S1) was obtained from PerkinElmer Human Health, Wallac Oy, Turku, Finland and used without further purification

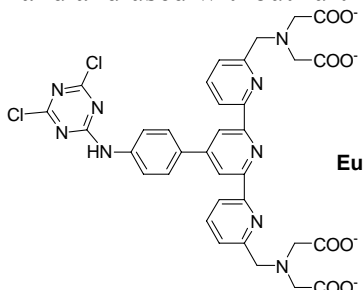

**Figure S1.** Formula of the Eu-W8044 chelate.

## 2. Bioconjugation of the helicate and test of the resulting detection probe

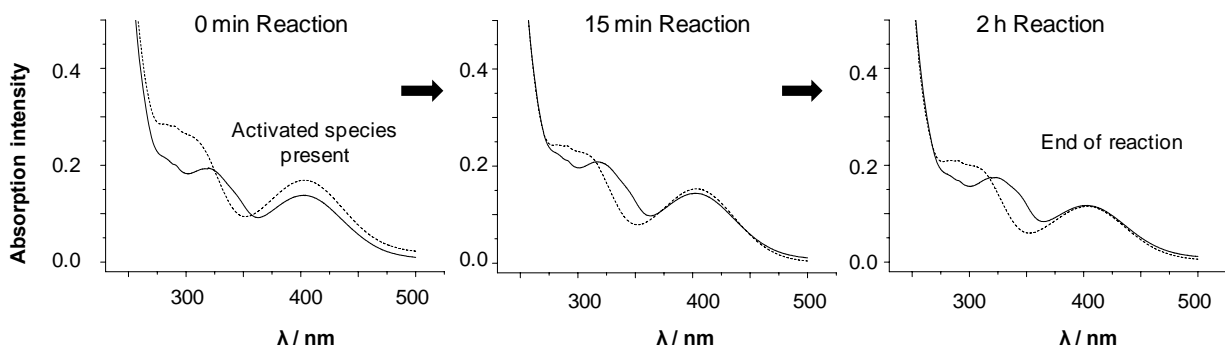

**Figure S2.** Absorption spectra before (—) and after (·····) addition of 20  $\mu\text{L}$  of NaOH 5 M at different time intervals for monitoring the coupling step. Procedure: 10  $\mu\text{L}$  of the reacting mixture were diluted to 300  $\mu\text{L}$  by 0.01 M phosphate buffer (pH 7) at the given time intervals; NaOH induces hydrolysis of the activated ester and thus generation of the HNSA dianion. The absorbance at 406 nm stabilized after 2 h indicating the completion of the coupling reaction.

**Table S1.** Optimization of the bioconjugation reaction; reagent equivalents are with respect to avidin;  $t_{act}$ : activation step duration;  $t_{cpl}$ : coupling step duration; L/P = luminophore/protein ratio; solvent PBS 0.1 M. Final adopted conditions: entry **8**.

| Nr       | $[\text{Eu}_2(\text{L}^{\text{C}2\text{COOH}})_3]$<br>/eq. | EDCH,<br>NSA / eq. | $t_{act}$     | $t_{cpl}$  | $\text{pH}_{cpl}$ | L/P        |
|----------|------------------------------------------------------------|--------------------|---------------|------------|-------------------|------------|
| <b>1</b> | 100                                                        | 1000               | 15 min        | 2 h        | 8.2               | 1.8        |
| <b>2</b> | 8                                                          | 80                 | 15 min        | 2 h        | 8.2               | 1.7        |
| <b>3</b> | 6                                                          | 60                 | 15 min        | 2 h        | 8.2               | 1.1        |
| <b>4</b> | 10                                                         | 500                | 15 min        | 2 h        | 8.2               | 1.4        |
| <b>5</b> | 1                                                          | 10                 | 12 h          | 48 h       | 7.4               | 0.12       |
| <b>6</b> | 4                                                          | 40                 | 15 min        | 2 h        | 7.4               | 0.78       |
| <b>7</b> | 10                                                         | 100                | 15 min        | 2 h        | 9.1               | 2.2        |
| <b>8</b> | <b>10</b>                                                  | <b>100</b>         | <b>15 min</b> | <b>2 h</b> | <b>8.2</b>        | <b>3.2</b> |

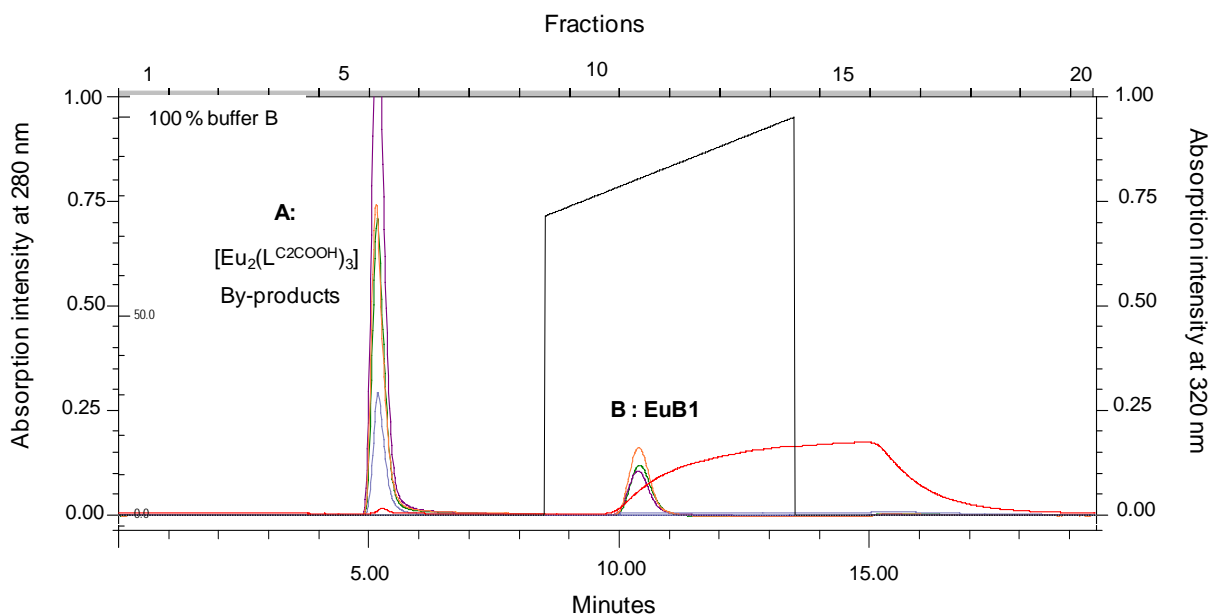

**Figure S3.** Chromatogram obtained during purification of **EuB1** using a cation exchange column and a gradient of solvents: 0-1 M NaCl in PBS buffer (pH 7.4) at a flow rate of 1 mL/min. The black line (—) indicates the % of buffer B (0.01 M PBS, 1 M NaCl, pH 7.4), (—) conductivity, (—) absorption at 406 nm, (—) absorption at 320 nm, (—) absorption at 280 nm, and (—) absorption at 244 nm.

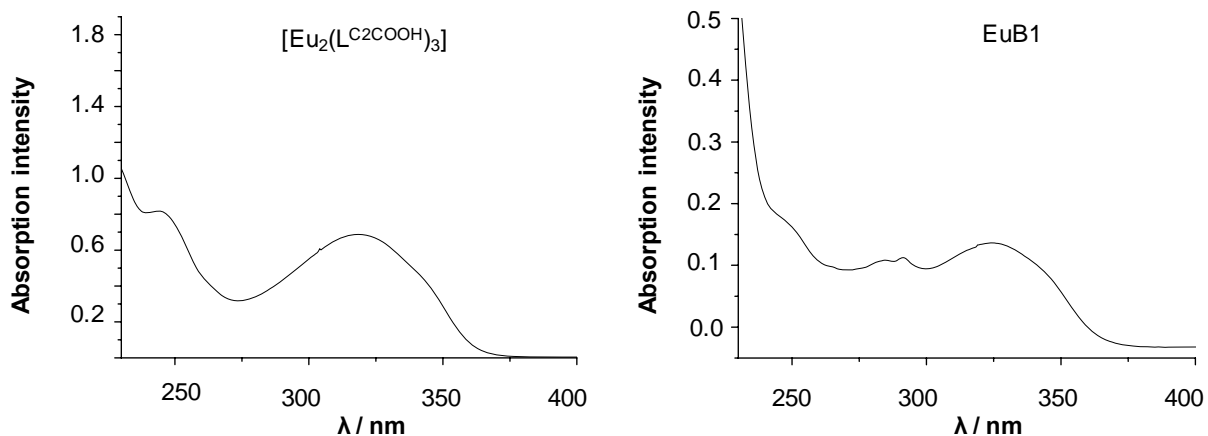

**Figure S4.** UV/Vis spectra of  $[\text{Eu}_2(\text{L}^{\text{C}2(\text{CO}_2\text{H})})_3]$  (left) and the Eu-labelled avidin complex **EuB1** (right) in 0.01 M PBS aqueous solution at pH 7.4.

**Table S2.** Crystal-field sublevels of  $[\text{Eu}_2(\text{L}^{\text{C}2(\text{CO}_2\text{H})})_3]$  and the bioconjugated analogue **EuB1** measured at room temperature in 0.01 M PBS aqueous solution pH 7.4.

| Transitions                             | $[\text{Eu}(\text{L}^{\text{C}2(\text{CO}_2\text{H})})_3]$<br>( $\nu / \lambda$ )<br>[ $\text{cm}^{-1} / \text{nm}$ ] | $[\text{Eu}(\text{L}^{\text{C}2(\text{CO}_2\text{H})})_3]^{3-}$<br>Crystal-field sub-<br>levels / $\text{cm}^{-1}$ | <b>EuB1</b><br>( $\nu / \lambda$ )<br>[ $\text{cm}^{-1} / \text{nm}$ ] | <b>EuB1</b><br>Crystal-field sub-<br>levels / $\text{cm}^{-1}$ |
|-----------------------------------------|-----------------------------------------------------------------------------------------------------------------------|--------------------------------------------------------------------------------------------------------------------|------------------------------------------------------------------------|----------------------------------------------------------------|
| $^5\text{D}_0 \rightarrow ^7\text{F}_0$ | 17277 / 578.8                                                                                                         | 0                                                                                                                  | 17268 / 579.1                                                          | 0                                                              |
| $^5\text{D}_0 \rightarrow ^7\text{F}_1$ | 17004 / 588.1<br>16824 / 594.4                                                                                        | 273, 453                                                                                                           | 16995 / 588.4<br>16824 / 594.4                                         | 273, 444                                                       |
| $^5\text{D}_0 \rightarrow ^7\text{F}_2$ | 16258 / 615.1<br>16155 / 619.0                                                                                        | 1019, 1122                                                                                                         | 16258 / 615.1<br>16147 / 619.3                                         | 1010, 1121                                                     |
| $^5\text{D}_0 \rightarrow ^7\text{F}_3$ | 15430 / 648.1<br>15330 / 652.3                                                                                        | 1847, 1947                                                                                                         | 15430 / 648.1<br>15330 / 652.3                                         | 1838, 1938                                                     |
| $^5\text{D}_0 \rightarrow ^7\text{F}_4$ | 14548 / 687.4<br>14472 / 691.0<br>14378 / 695.5<br>14243 / 702.1                                                      | 2729, 2805,<br>2899, 3034                                                                                          | 14548 / 687.4<br>14472 / 691.0<br>14372 / 695.8<br>14243 / 702.1       | 2720, 2796,<br>2896, 3025                                      |

**Table S3.** Relative corrected intensities of  $^5D_0 \rightarrow ^7F_J$  transitions of  $[\text{Eu}_2(\text{L}^{\text{C}2(\text{COOH})})_3]$  and **EuB1** in 0.01M PBS aqueous solution pH 7.4 at room temperature.

| Complex                                                    | $^7F_1$ | $^7F_2$ | $^7F_3$ | $^7F_4$ |
|------------------------------------------------------------|---------|---------|---------|---------|
| $[\text{Eu}(\text{L}^{\text{C}2(\text{CO}_2\text{H})})_3]$ | 1.00    | 1.01    | 0.11    | 1.80    |
| <b>EuB1</b>                                                | 1.00    | 0.95    | 0.10    | 1.77    |

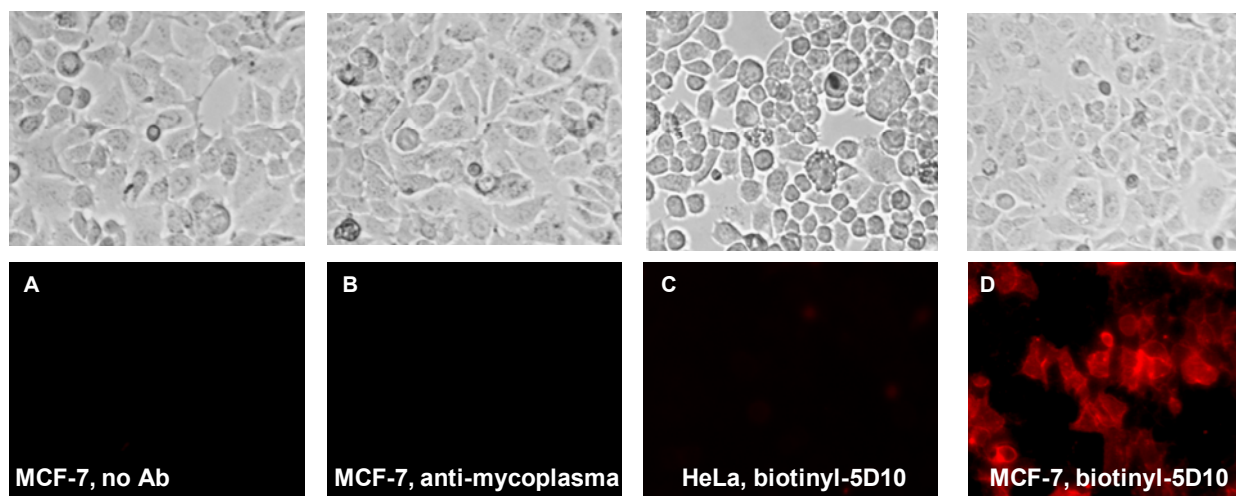

**Figure S5.** Microscopy images of the immunoluminescence assay of **EuB1** in MCF-7 and HeLa cell lines. Negative controls: (A) no Ab, MCF-7 cells; (B) anti- mycoplasma mAb and MCF-7 cells; (C) biotinylated 5D10 and HeLa cells. Positive control: (D) biotinylated 5D10 and MCF-7. Top row: bright field images. Bottom row: TR images: excitation, BP filter 340 nm (70 nm); emission, LP filter LP (420 nm); delay time, 100  $\mu\text{s}$ ; exposure time, 60 s.

Experiments in microchannels

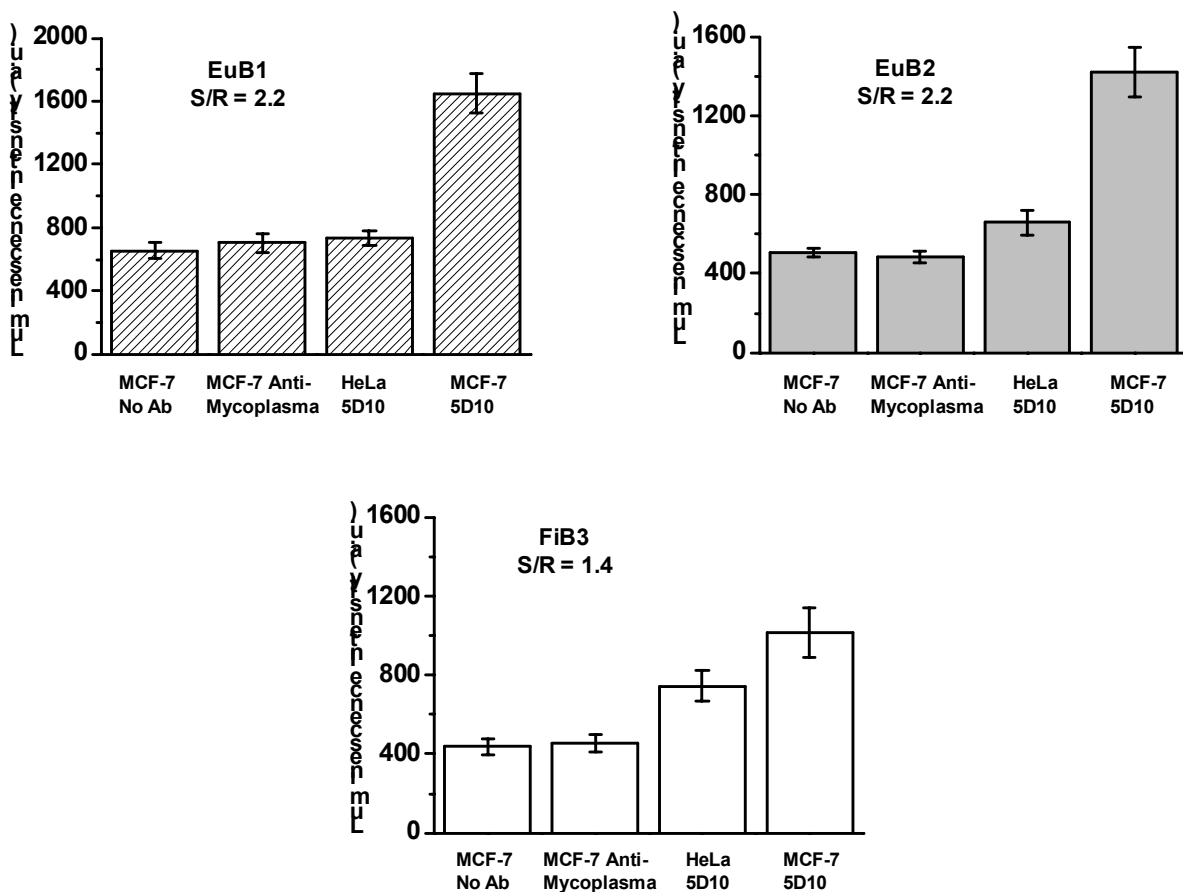

**Figure S6.** Comparison between the time-resolved lanthanide-based luminescence and organic dye-based fluorescence detection of the antigen recognized by 5D10 on MCF-7 (+) and HeLa (-) cells.
